# Supplementary material for: State-of-the-Art Multimodality Imaging in Sudden Cardiac Arrest with Focus on Idiopathic Ventricular Fibrillation: A Review
Source: MDPI journal article supplement (doi:10.3390/jcm11164680), 2022-08-10
Supplement: s1 [file s1]

## Supplementary tables

**Table S1. Additional diagnostic imaging yield in patients with unexplained cardiac arrest.**

| First Author, Year, Journal                               | Setting       | Study population                                                                                                                                    | Clinical assessment                                                                                                                                                 | N                                               | Baseline characteristics           | Diagnostic imaging yield                                          |                                                             |                                                                                   |
|-----------------------------------------------------------|---------------|-----------------------------------------------------------------------------------------------------------------------------------------------------|---------------------------------------------------------------------------------------------------------------------------------------------------------------------|-------------------------------------------------|------------------------------------|-------------------------------------------------------------------|-------------------------------------------------------------|-----------------------------------------------------------------------------------|
| Herman, 2016, <i>Circulation A&amp;E</i> <sup>1</sup>     | Multicenter   | Survivors of an unexplained CA with documented cardiac collapse or VT/VF requiring defibrillation. Patients with known causes* for CA are excluded. | All patients underwent standard care*, enrolled patients received additional testing if applicable (stress-ECG, saECG, CMR with gadolinium and provocation testing) | 200                                             | Age; 41.5±14.7 years, 41% female   | CMR Performed 154/200 (77%)<br><br>Diagnostic yield 15/154 (9.7%) |                                                             | Overall diagnostic yield 68/200 (34%) at baseline<br><br>81/200 (40.5%) during FU |
| Merghani, 2021, <i>J Am Heart Assoc</i> <sup>2</sup>      | Single center | SCA survivors with documented VT or VF                                                                                                              | Comprehensive cardiac testing#, with additional tests (CMR, Ajmaline testing, saECG, exercise-ECG, genetic testing) when inconclusive                               | 327 SCA survivors                               | Age; 61.9±16.2 years, female 20.2% | CMR Performed 24/31 (77%)<br>Diagnostic yield 3/24 (12.5%)        | Echo performed 31/31 (100%)<br>Diagnostic yield 1/31 (3.2%) | Overall diagnostic yield 15/31 (48%) during FU                                    |
|                                                           |               |                                                                                                                                                     |                                                                                                                                                                     | 31 unexplained after initial systematic testing |                                    |                                                                   |                                                             |                                                                                   |
| Waldman, 2018, <i>European Heart Journal</i> <sup>3</sup> | Multicenter   | SCA survivors                                                                                                                                       | Cardiac testing at the discretion of the medical team after initial investigation†                                                                                  | 717 SCA survivors                               | NR for all patients                | CMR Performed 72/88 (82%)<br>Diagnostic yield 25/72 (34.7%)       |                                                             | Overall diagnostic yield baseline and FU 39/88 (44%)                              |
|                                                           |               |                                                                                                                                                     |                                                                                                                                                                     | 88 unexplained after initial testing            |                                    |                                                                   |                                                             |                                                                                   |

\* Causes: Patients were excluded in case of coronary artery disease (stenosis >50% or anomalous coronary arteries), hyperkalemia, drug overdose, hypertrophic cardiomyopathy, commotio cordis, Brugada syndrome or idiopathic ventricular tachycardia. Standard care included continuous ECG telemetry for 72 hours, echocardiography and coronary angiography or cardiac CT or MRI.

# Comprehensive cardiac testing: history, physical examination, ECG, echocardiogram, and coronary angiography

† Initial investigation: ECG, echocardiogram, and coronary angiography.

Abbreviations: ECG: electrocardiography, CMR: cardiac magnetic resonance, FU: follow up, saECG: signal-averaged electrocardiography, NR: not reported, SCA: sudden cardiac arrest, VT: ventricular tachycardia, VF: ventricular fibrillation

**Table S2. Overview of cohort studies with unexplained cardiac arrest of idiopathic ventricular fibrillation patients. *Studies focusing on genetic testing are not included.***

| First Author, Year, Journal, Country                                                         | Setting                                                                                                                                                 | Patient cohort                                                                                                                                                                    | N                                                                            |
|----------------------------------------------------------------------------------------------|---------------------------------------------------------------------------------------------------------------------------------------------------------|-----------------------------------------------------------------------------------------------------------------------------------------------------------------------------------|------------------------------------------------------------------------------|
| Blom, 2019, <i>Europace</i> <sup>4</sup>                                                     | Multicenter<br>The Netherlands                                                                                                                          | Cardiac arrest patients with shockable rhythm and diagnosis of IVF                                                                                                                | 217                                                                          |
| Conte, 2017, <i>Europace</i> <sup>5</sup>                                                    | Single Center<br>Switzerland                                                                                                                            | OHCA patients due to VT or VF (documented), considered as IVF after exclusion of cardiac, respiratory, metabolic or toxicological etiology and maintaining a normal ECG during FU | 3407 OHCA patients, 2192 cardiac origin OHCA, 8 true IVF patients            |
| Conte, 2019, <i>Europace</i> <sup>6</sup>                                                    | Multicenter study (web-based) in several countries: Belgium, France, Germany, Greece, Israel, Italy, Mexico, Norway, Spain, Switzerland, United Kingdom | OHCA patients with IVF; normal ECG and echocardiography at baseline and follow up, exclusion of cardiac, respiratory, metabolic and toxicological etiology                        | 245                                                                          |
| Chaudhry, 2019, <i>Journal of Electrocardiology</i> <sup>7</sup>                             | Multicenter<br>Sweden                                                                                                                                   | Cardiac arrest survivors with IVF                                                                                                                                                 | 50                                                                           |
| Cunningham, 2020, <i>Heart Rhythm</i> . <sup>8</sup>                                         | Multicenter<br>Canada                                                                                                                                   | UCA in children and adolescents (1-19 years), excluding known causes for cardiac arrest                                                                                           | 46                                                                           |
| Frontera, 2019, <i>JAHA</i> <sup>9</sup>                                                     | Multicenter<br>45 tertiary cardiac care centers worldwide                                                                                               | SCA with documented VF, absence of an underlying cause following comprehensive analysis, age ≤ 16 years                                                                           | 54                                                                           |
| Herman, 2016, <i>Circulation A&amp;E</i> . <sup>1</sup>                                      | Multicenter<br>Canada                                                                                                                                   | Survivors of an UCA with documented cardiac collapse or VT/VF requiring defibrillation. Patients with known causes are excluded                                                   | 200                                                                          |
| Jiménez-Jaimez, 2015, <i>American Journal of Cardiology</i> <sup>10</sup>                    | Multicenter<br>Spain                                                                                                                                    | UCA patients (no diagnostic findings on ECG, echocardiography or CAG) with performed AED shock. Excluded known causes for arrest                                                  | 35                                                                           |
| Merghani, 2021, <i>J Am Heart Assoc</i> <sup>2</sup>                                         | Single center<br>United Kingdom                                                                                                                         | SCA survivors with documented VT or VF                                                                                                                                            | 327 SCA survivors, 31 UCA after initial testing (ECG, echocardiography, CAG) |
| Peres, 2020, <i>Archives of Cardiovascular Diseases Supplements</i> , abstract <sup>11</sup> | Single center<br>France                                                                                                                                 | VF survivors without reversible cause                                                                                                                                             | 66, 40 UCA after initial testing (ECG, echocardiography, CAG)                |

|                                                                               |                          |                                                                               |                                                                                             |
|-------------------------------------------------------------------------------|--------------------------|-------------------------------------------------------------------------------|---------------------------------------------------------------------------------------------|
| Stampe, 2020, <i>JCE</i> <sup>12</sup>                                        | Single center<br>Denmark | SCA survivors (secondary ICD indication) and IVF diagnosis                    | 1319 ICD indications, 81 IVF patients                                                       |
| Stepien-Wojno 2018, <i>Polish Archives of Internal Medicine</i> <sup>13</sup> | Single center<br>Poland  | UCA survivors and family members, unexplained after exclusion of known causes | 44                                                                                          |
| Waldman, 2018, <i>European Heart Journal</i> <sup>3</sup>                     | Multicenter<br>France    | SCA survivors                                                                 | 717 cardiac SCA, 88 UCA after initial testing (ECG, echocardiography, CAG), 49 IVF patients |

Abbreviations: AED; automated external defibrillator, CAG; coronary angiogram, ICD; implantable cardioverter defibrillator, IVF; idiopathic ventricular fibrillation, OHCA; out of hospital cardiac arrest, SCA; sudden cardiac arrest, UCA: unexplained cardiac arrest; VT; ventricular tachycardia, VF; ventricular fibrillation,.

**Table S3. Overview of the diagnostic work-up performed in unexplained cardiac arrest of idiopathic ventricular fibrillation cohorts.**

| First Author,<br>Year              | Performed diagnostic testing |           |             |           |                     |           |          |                        |                                  |             |               |                           |            |
|------------------------------------|------------------------------|-----------|-------------|-----------|---------------------|-----------|----------|------------------------|----------------------------------|-------------|---------------|---------------------------|------------|
|                                    | Electrical                   |           |             |           | Imaging             |           |          |                        |                                  | Provocation |               |                           |            |
|                                    | ECG                          | Holter    | Stress-test | EPS       | Echo                | CMR       | CT       | Angiography            | CAG                              | SCB         | Isoproterenol | Adrenaline or epinephrine | Ergonovine |
| Blom, 2019 <sup>4</sup>            | 217 (100%)                   | 121 (56%) | 172 (79%)   | 111 (51%) | 208 (96%)           | 148 (68%) | NA       | NA                     | 203 (94%) (or CT)                | 130 (60%)   | NA            | NA                        | 53 (24%)   |
| Conte, 2017 <sup>5</sup>           | 100% (by inclusion)          | NA        | NA          | NA        | NA                  | 4/8 (50%) | NA       | NA                     | NA                               | 4/8 (50%)   | NA            | NA                        | NA         |
| Conte, 2019 <sup>6</sup>           | 100% (by inclusion)          | NA        | 195 (80%)   | 144 (59%) | 100% (by inclusion) | 160 (65%) | 25 (10%) | NA                     | 220 (90%)                        | 156 (64%)   | NA            | NA                        | NA         |
| Chaudhry, 2019 <sup>7</sup>        | 47 (94%)                     | 12 (24%)  | 30 (60%)    | 17 (34%)  | 50 (100%)           | 27 (54%)  | 2 (4%)   | NA                     | 38 (76%)                         | 9 (18%)     | NA            | NA                        | NA         |
| Cunningham, 2020 <sup>8</sup>      | 44 (96%)                     | NA        | 19 (41%)    | NA        | 39 (85%)            | 26 (57%)  | 1 (2%)   | NA                     | 4 (9%)                           | NA          | NA            | NA                        | NA         |
| Frontera, 2019 <sup>9</sup>        | 54 (100%)                    | NA        | 45 (83%)    | 34 (63%)  | 54 (100%)           | 38 (70%)  | NA       | 24 (44%)               | NA                               | 37 (69%)    | 38 (70%)      | NA                        | NA         |
| Herman, 2016 <sup>1</sup>          | 100% (by inclusion)          | 56 (28%)  | 146 (73%)   | 62 (31%)  | 100% (by inclusion) | 154 (77%) | NA       | 8 (4%): RV angiography | 100% (by inclusion, with CT/CMR) | 131 (66%)   | NA            | 136 (68%)                 | NA         |
| Jiménez-Jaimez, 2015 <sup>10</sup> | 100% (by inclusion)          | NA        | NA          | 15 (43%)  | 100% (by inclusion) | 13 (37%)  | NA       | NA                     | 100% (by inclusion)              | 32 (91%)    | NA            | 35 (100%)                 | NA         |

|                                  |                     |            |          |          |                     |          |          |                         |            |          |          |       |          |
|----------------------------------|---------------------|------------|----------|----------|---------------------|----------|----------|-------------------------|------------|----------|----------|-------|----------|
| Merghani, 2021 <sup>2</sup>      | 31 (100%)           | NA         | 7 (23%)  | NA       | 31 (100%)           | 24 (77%) | NA       | NA                      | 31 (100%)  | 25 (81%) | NA       | NA    | NA       |
| Peres, 2020 <sup>11</sup>        | NA                  | NA         | NA       | NA       | NA                  | NA       | NA       | NA                      | NA         | NA       | NA       | NA    | NA       |
| Stampe, 2020 <sup>12</sup>       | 81 (100%)           | 19 (23.5%) | 63 (78%) | 21 (26%) | 81 (100%)           | 64 (79%) | 12 (15%) | NA                      | 72 (89%)   | 56 (69%) | NA       | NA    | NA       |
| Stepien-Wojno 2018 <sup>13</sup> | 44 (100%)           | 28 (64%)   | 20 (45%) | NA       | 44 (100%)           | 14 (32%) | NA       | NA                      | 44 (100%)  | 5 (11%)  | NA       | NA    | NA       |
| Waldman, 2018 <sup>3</sup>       | 100% (by inclusion) | NA         | 10 (11%) | NA       | 100% (by inclusion) | 72 (82%) | NA       | NA                      | NA         | 24 (27%) | NA       | 13    | 39       |
| Waldman 2018, IVF only           | 100% (by inclusion) | 6 (12%)    | 4 (8%)   | 12 (25%) | 100% (by inclusion) | 40 (82%) | 1 (2%)   | 5 (10%): RV angiography | 47 (95.9%) | 21 (43%) | 10 (20%) | 0 (0) | 19 (39%) |

Abbreviations: CAG; coronary angiography, CMR; cardiac magnetic resonance CT: computed tomography, ECG; electrocardiogram, EPS; electrophysiological study, NA; not available, SCB; sodium channel blockage, RV; right ventricle.

**Table S4. Summary of studies focusing on CMR in patients with ventricular arrhythmias.**

| First Author, Year, Journal                                      | Setting                                  | Objective                                                                                          | Population                                                                                                                                        | N                                                                          | Characteristics            | CMR protocol                                                                                                                             | Results                                                                                                                                                                                                                                                                                                                  |                                                                                                                                                                                                                                                                                                                                          |
|------------------------------------------------------------------|------------------------------------------|----------------------------------------------------------------------------------------------------|---------------------------------------------------------------------------------------------------------------------------------------------------|----------------------------------------------------------------------------|----------------------------|------------------------------------------------------------------------------------------------------------------------------------------|--------------------------------------------------------------------------------------------------------------------------------------------------------------------------------------------------------------------------------------------------------------------------------------------------------------------------|------------------------------------------------------------------------------------------------------------------------------------------------------------------------------------------------------------------------------------------------------------------------------------------------------------------------------------------|
|                                                                  |                                          |                                                                                                    |                                                                                                                                                   |                                                                            |                            |                                                                                                                                          | Overall                                                                                                                                                                                                                                                                                                                  | CMR diagnosis                                                                                                                                                                                                                                                                                                                            |
| Andreini, 2020, <i>JACC Cardiovascular imaging</i> <sup>14</sup> | Prospective<br>Single center             | Ability of CMR to identify a SHD when echocardiography was normal                                  | Patient with a recent diagnosis of a significant VA and no pathological findings on echocardiography                                              | 946<br><br>~ 61 sustained VT<br><br>~ 12 cardiac arrest                    | 41 ±16 years, 64% male     | 1.5T, cine imaging, T1-weighted images, T2-weighted imaging, LGE imaging                                                                 | <ul style="list-style-type: none"> <li>- Results not specified between sustained VT or cardiac arrest patients</li> <li>- SHD identified in 241 patients (25.5%)</li> </ul>                                                                                                                                              | <ul style="list-style-type: none"> <li>- 91 myocarditis</li> <li>- 50 ARVC, 5 LDAC</li> <li>- 39 DCM</li> <li>- 22 ischemic heart disease</li> <li>- 12 HCM</li> <li>- 5 non-compaction LV</li> <li>- 5 pericarditis</li> <li>- 10 congenital heart disease</li> </ul>                                                                   |
| Baritussio, 2017, <i>Resuscitation</i> <sup>15</sup>             | Retrospective<br>Multicenter (2 centers) | Impact of CMR after clinical, ECG and echocardiogram in patients with an inconclusive angiogram    | OHCA patients with inconclusive angiogram (evidence of stable obstructive CAD with no culprit lesion (≥ 70% stenosis) or unobstructed coronaries) | 110<br><br>~ 37 stable obstructive CAD<br><br>~ 73 unobstructed coronaries | 58 (46-68) years, 76% male | 1.5T<br>Cine sequences and post-contrast imaging<br>On indication: T2-short true inversion recovery, and stress perfusion with adenosine | <ul style="list-style-type: none"> <li>- 72/110 patients with LGE, significantly more in stable obstructive CAD patients</li> <li>- Pathologic substrate identified in 69%</li> </ul> <p>Echocardiography:</p> <ul style="list-style-type: none"> <li>- Performed in 92 patients, pathologic substrate in 54%</li> </ul> | <ul style="list-style-type: none"> <li>- 45 IHD</li> <li>- 31 non-IHD</li> <li>- 9 nonspecific findings</li> <li>- 25 structurally normal heart</li> <li>- Same diagnosis as echocardiography in 51/92 patients</li> <li>- CMR changed diagnosis in 27 patients (25%); more in stable obstructive CAD patients (based on LGE)</li> </ul> |
| Hennig, 2018, <i>Europace</i> <sup>16</sup>                      | Prospective, single center               | Assess the diagnostic yield of CMR (including high-resolution LGE) after non-CMR diagnostic workup | Patients with first episode of (sustained or non-sustained) VT, VF or aborted SCD                                                                 | 157<br><br>~ 52 NSVT, 88 sustained VT<br><br>~17 VF or aborted SCD         | 54±17 years, 75% male      | 1.5T, cine imaging, LGE imaging including high resolution LGE imaging                                                                    | <ul style="list-style-type: none"> <li>- CMR identified a structural substrate in 105 patients; in 12/17 (71%) patients with VF/SCD</li> </ul>                                                                                                                                                                           | <ul style="list-style-type: none"> <li>- 46 ICM</li> <li>- 38 NICM</li> <li>- 11 ARVC</li> <li>- 3 HCM</li> <li>- 7 Other</li> <li>- 52 no SHD</li> </ul>                                                                                                                                                                                |

|                                                                |                                                                                                          |                                                                                                                |                                                                                                                                                                                                                                          |                                                |                                           |                                                                                                    |                                                                                                                                                                                                                                         |                                                                                                                                                                                                                                                   |
|----------------------------------------------------------------|----------------------------------------------------------------------------------------------------------|----------------------------------------------------------------------------------------------------------------|------------------------------------------------------------------------------------------------------------------------------------------------------------------------------------------------------------------------------------------|------------------------------------------------|-------------------------------------------|----------------------------------------------------------------------------------------------------|-----------------------------------------------------------------------------------------------------------------------------------------------------------------------------------------------------------------------------------------|---------------------------------------------------------------------------------------------------------------------------------------------------------------------------------------------------------------------------------------------------|
|                                                                |                                                                                                          |                                                                                                                |                                                                                                                                                                                                                                          | ~45 patients with a known SHD before inclusion |                                           |                                                                                                    |                                                                                                                                                                                                                                         | <ul style="list-style-type: none"> <li>- Pre-CMR diagnostic work-up identified a SHD in 28/112 patients, increasing this rate to 60/112 after including CMR results</li> <li>- CMR modified the diagnostic category in 48/112 patients</li> </ul> |
| Kim, 2021, <i>JCM</i> <sup>17</sup>                            | Retrospective Multicenter (3 centers)                                                                    | Evaluate the usefulness of CMR imaging in OHCA survivors with inconclusive CAG findings and treatment with TTM | Unexplained OHCA with targeted temperature and inconclusive CAG, excluded patients with proven etiology by CAG (culprit lesion), ergonovine stress test, EPS or echocardiography, diagnosed (and excluded) patients with IVF before CMR. | 40                                             | Age 37.5 years (IQR 29.0-51.3), 72.5% men | 1.5T, cine images, T1-weighted imaging, T2-weighted imaging, LGE                                   | <ul style="list-style-type: none"> <li>- 23 (57.5%) normal</li> <li>- 12 (30%) non-diagnostic findings (wall motion dyskinesia, decreased contractility)</li> </ul>                                                                     | <ul style="list-style-type: none"> <li>- 23 normal</li> <li>- 12 non-diagnostic</li> <li>- 5 non-ICM</li> </ul>                                                                                                                                   |
| Neilan, 2015, <i>JACC Cardiovascular Imaging</i> <sup>18</sup> | Prospective (collected data) and retrospective (follow up adverse events)<br><br>Multicenter (2 centers) | Identify the role of LGE CMR in the work-up of patients with SCA                                               | SCA (either VT or VF) survivors referred for CMR after clinical assessment, ECG, echocardiogram and coronary angiogram without clear cause                                                                                               | 137<br>~105 VF                                 | Age 56±12 years, 66% male                 | 1.5T or 3T, ECG gating, breath-holding, cine steady-state free precession imaging and LGE imaging. | <ul style="list-style-type: none"> <li>- LGE present in 98 (71%)</li> <li>- VT was more common in patients with LGE, VF in patients without LGE</li> <li>- Diagnosis or potential substrate identified in 104 patients (76%)</li> </ul> | <ul style="list-style-type: none"> <li>- 60 infarct pattern LGE</li> <li>- 21 non-infarct pattern LGE</li> <li>- 14 active myocarditis</li> <li>- 3 HCM</li> <li>- 3 Sarcoidosis</li> <li>- 3 ARVC</li> </ul>                                     |

|                                                                           |                                    |                                                                                                      |                                                                                                                                    |                                   |                                                     |                                                                                                                                           |                                                                                                                                                                                                                                                                                                                                                   |                                                                                                                                                                                                                                                                                                                                                |
|---------------------------------------------------------------------------|------------------------------------|------------------------------------------------------------------------------------------------------|------------------------------------------------------------------------------------------------------------------------------------|-----------------------------------|-----------------------------------------------------|-------------------------------------------------------------------------------------------------------------------------------------------|---------------------------------------------------------------------------------------------------------------------------------------------------------------------------------------------------------------------------------------------------------------------------------------------------------------------------------------------------|------------------------------------------------------------------------------------------------------------------------------------------------------------------------------------------------------------------------------------------------------------------------------------------------------------------------------------------------|
|                                                                           |                                    |                                                                                                      |                                                                                                                                    |                                   |                                                     |                                                                                                                                           | - The presence and extent of LGE were associated with adverse events                                                                                                                                                                                                                                                                              |                                                                                                                                                                                                                                                                                                                                                |
| Marstrand, 2016, <i>Europace</i> <sup>19</sup>                            | Retrospective<br><br>Single center | Assess the diagnostic precision of CMR and the ability to change the indication for family screening | Cardiac arrest, VT or syncope patients referred for CMR                                                                            | 79<br>~ 31 VT<br>~ 44 aborted SCD | 43 (13) years, 71% male = aborted SCD/VT population | 1.5 or 3T, steady-state free precision cine images, LGE by T1-weighted gradient echo images, T2-weighted images at physician's discretion | - Based on CMR data, preliminary diagnoses were changed in 38 of 79 patients, decreasing the indication for family screening with 19%                                                                                                                                                                                                             | <ul style="list-style-type: none"> <li>- 29 idiopathic VF/VT</li> <li>- 9 ARVC</li> <li>- 3 DCM</li> <li>- 2 HCM</li> <li>- 6 unspecified cardiomyopathy</li> <li>- 9 IHD</li> <li>- 5 other</li> <li>- 4 primary electrical cardiac diseases</li> <li>- 3 sarcoidosis/myocarditis</li> <li>- 9 normal (only in NSVT/syncope group)</li> </ul> |
| Rodrigues, 2017, <i>Circulation: Cardiovascular Imaging</i> <sup>20</sup> | Retrospective<br><br>Multicenter   | Determining the pathogenesis and prognosis with CMR                                                  | Cardiac arrest survivors or hemodynamically unstable sustained VT, without CAD (on CAG, stenosis ≥30% excluded) who underwent CMR. | 164<br>~ 135 SCA                  | 48±15yrs, 65% men                                   | 1.5T, cine images, LGE images, and LGE. On indication: T1-weighted and T2-weighted                                                        | <ul style="list-style-type: none"> <li>- Contributed to the diagnosis in 80 patients (49%)</li> <li>- 50 patients in whom the final diagnosis would not been made without CMR (30%)</li> <li>- Abnormal LGE present in 61 (37%)</li> <li>- CMR-defined diagnosis, presence and extent of LGE were associated with more MACE (41 vs 21)</li> </ul> | <ul style="list-style-type: none"> <li>- 27 DCM</li> <li>- 22 myocarditis/sarcoidosis</li> <li>- 13 occult MI</li> <li>- 9 HCM</li> <li>- 3 ARVC</li> <li>- 4 severe valvular disease</li> <li>- 1 Takotsubo</li> <li>- 1 undetermined CMP/other</li> <li>- 30 minor/nonspecific</li> <li>- 55 normal</li> </ul>                               |



|                                                                      |                                    |                                                                   |                                                                                                                                                                                                                                                                                                                                               |                                              |                                       |                                                                                                                                               |                                                                                                                                                                                                                                                                                                                                                                                                                              |                                                                                                                                                                                                                                                                                                                                                                                                       |
|----------------------------------------------------------------------|------------------------------------|-------------------------------------------------------------------|-----------------------------------------------------------------------------------------------------------------------------------------------------------------------------------------------------------------------------------------------------------------------------------------------------------------------------------------------|----------------------------------------------|---------------------------------------|-----------------------------------------------------------------------------------------------------------------------------------------------|------------------------------------------------------------------------------------------------------------------------------------------------------------------------------------------------------------------------------------------------------------------------------------------------------------------------------------------------------------------------------------------------------------------------------|-------------------------------------------------------------------------------------------------------------------------------------------------------------------------------------------------------------------------------------------------------------------------------------------------------------------------------------------------------------------------------------------------------|
| White, 2012,<br><i>Cardiovasc Imaging</i> <sup>21</sup>              | Prospective<br><br>Single center   | Diagnostic yield of CMR imaging compared to non-CMR imaging       | Patients with aborted SCD or symptomatic SMVT, excluded patients with ischemic events                                                                                                                                                                                                                                                         | 82<br><br>~30 aborted SCD patients<br>~22 VF | 46 ±14 years, 70% male (SCD patients) | 3T (n=52), 1.5T (n=28), cine imaging (steady state free precession-base pulse sequence), T2-weighted imaging, DE imaging, T1-weighted imaging | <ul style="list-style-type: none"> <li>- CMR identified substrate for VA in 61 patients (74%); 20 of the 30 patients with SCD</li> <li>- New or alternative diagnosis in 41 (49%) of the patients</li> <li>- Change in diagnosis in SCD: 21 (68%)</li> </ul>                                                                                                                                                                 | <ul style="list-style-type: none"> <li>- 21 normal</li> <li>- 5 unexplained LV dysfunction</li> <li>- 29 CAD with LV dysfunction</li> <li>- 17 inflammatory CMP <ul style="list-style-type: none"> <li>o 3 sarcoidosis</li> </ul> </li> <li>- 1 HCM</li> <li>- 9 Other <ul style="list-style-type: none"> <li>o 6 ARVC</li> <li>o 1 LVNC</li> <li>o 2 unknown midwall fibrosis</li> </ul> </li> </ul> |
| Zaremba, 2018,<br><i>European Journal of Radiology</i> <sup>22</sup> | Retrospective<br><br>Single center | CMR findings in young aborted SCD patients without ischemic cause | <p>First episode of aborted SCD or sustained VT, patients &lt;50 years, who underwent CMR and had ICD implantation</p> <p>Excludes reversible causes with ECG, blood test, echocardiography and CAG.</p> <p>Patients with CHD, myocarditis, previous structural heart disease, electrolyte abnormality or drug intoxication were excluded</p> | 36<br><br>~ 20 VF as initial rhythm          | 37.6 years (24.1-43.2), 69% male      | 1.5T (n = 24), 3T (n = 10), 1.5T (n=2), cine images, LGE imaging                                                                              | <ul style="list-style-type: none"> <li>- CMR did not alter the diagnosis in any study participants</li> <li>- LGE was detectable in 87%, but only in small amounts and did not differ between CMP and arrhythmia patients</li> <li>- Aborted SCD survivors had impaired global strain (longitudinal, circumferential and radial direction) compared to reference data, but was not associated with cardiomyopathy</li> </ul> | - Diagnosis was not solely made on CMR                                                                                                                                                                                                                                                                                                                                                                |

|                                                |                                          |                                                                                                           |                                                                                                 |     |                                |                                                      |                                                                                                                                                                                                                                                                                                                                                                                                                                                           |                                                                                                                                                                                                                                                            |
|------------------------------------------------|------------------------------------------|-----------------------------------------------------------------------------------------------------------|-------------------------------------------------------------------------------------------------|-----|--------------------------------|------------------------------------------------------|-----------------------------------------------------------------------------------------------------------------------------------------------------------------------------------------------------------------------------------------------------------------------------------------------------------------------------------------------------------------------------------------------------------------------------------------------------------|------------------------------------------------------------------------------------------------------------------------------------------------------------------------------------------------------------------------------------------------------------|
| Zorzi, 2018, <i>Heart Rhythm</i> <sup>23</sup> | Retrospective<br>Single center           | Determine the diagnostic and prognostic role of CMR in OHCA<br><br>Compares patients with CAD and without | Survivors of arrhythmic OHCA who had CAG and CMR ≤ 7 days                                       | 44  | Age 43 (39-62) years, 84% male | Cine imaging, T2-weighted imaging, LGE imaging       | <ul style="list-style-type: none"> <li>- 41% had CAD (n = 18)</li> <li>- Pathologic myocardial substrate in 19 (73%) patients without CAD</li> <li>- CMR confirmed diagnosis in all CAD patients and modified the initial clinical diagnosis in 11 patients (42%) and confirmed in 58% of patients without CAD</li> <li>- Myocardial edema suggest a potentially reversible myocardial lesion with no arrhythmic event in 3 years of follow up</li> </ul> | <ul style="list-style-type: none"> <li>- 5 DCM</li> <li>- 3 MVP</li> <li>- 2 IHD</li> <li>- 2 non-ischemic LV scar</li> <li>- 1 ACM</li> <li>- 1 HCM</li> <li>- 1 Takotsubo</li> <li>- 4 acute myocarditis</li> <li>- 7 structural normal heart</li> </ul> |
| Zorzi, 2021, <i>JAHA</i> <sup>24</sup>         | Retrospective<br>Multicenter (9 centers) | Investigate the possible favorable prognosis of myocardial oedema in SCA patients                         | SCA survivors who underwent CMR imaging < 1 month with T2-weighted imaging and ICD implantation | 101 | 74 (31-59) years, 70% male     | 1.5T, cine imaging, T2-weighted imaging, LGE imaging | <ul style="list-style-type: none"> <li>- Myocardial edema present in 18/101 patients; 7 non-ischemic and 11 ischemic</li> <li>- CMR identified a myocardial substrate in 43 SCA survivors (non-ischemic)</li> </ul>                                                                                                                                                                                                                                       | <ul style="list-style-type: none"> <li>- 29 normal structural heart</li> <li>- 13 DCM</li> <li>- 4 ACM</li> <li>- 3 HCM</li> <li>- 16 isolated non-ischemic scar</li> <li>- 7 MVP</li> <li>- 7 acute myocarditis</li> <li>- 21 IHD</li> </ul>              |

Abbreviations: ACM: arrhythmogenic cardiomyopathy, ARVC; arrhythmogenic right ventricular cardiomyopathy, CAG; coronary angiogram, CHD: chronic heart disease, CMP; cardiomyopathy, CMR; cardiac magnetic resonance, DCM; dilated cardiomyopathy, ECG: electrocardiogram, EPS: electrophysiological study, HCM; hypertrophic cardiomyopathy, FU; follow up, IHD: ischemic heart disease, ICM; ischemic cardiomyopathy, LDAC; left dominant arrhythmogenic cardiomyopathy, LGE; late gadolinium enhancement, LV; left ventricle, LVEF: left ventricular ejection fraction, LVNC: left ventricular noncompaction, MACE: major adverse cardiac events, MI; myocardial infarction, MVP; mitral valve prolapse, NICM; non-ischemic cardiomyopathy, NSVT: non-sustained ventricular tachycardia, OHCA: out of hospital cardiac arrest, SCAD;

stable obstructive coronary artery disease, SCD; sudden cardiac death, SHD; structural heart disease, SMVT; sustained monomorphic VT, TTM; targeted temperature management, VA; ventricular arrhythmias, VF; ventricular fibrillation, VT; ventricular tachycardia.

#### List of included studies

1. Herman, A. R. M. *et al.* Outcome of apparently unexplained cardiac arrest: Results from investigation and follow-up of the prospective cardiac arrest survivors with preserved ejection fraction registry. *Circ. Arrhythmia Electrophysiol.* **9**, 1–10 (2016).
2. Merghani, A. *et al.* Diagnostic impact of repeated expert review & long-term follow-up in determining etiology of idiopathic cardiac arrest. *J. Am. Heart Assoc.* **10**, (2021).
3. Waldmann, V. *et al.* Characteristics and clinical assessment of unexplained sudden cardiac arrest in the real-world setting: Focus on idiopathic ventricular fibrillation. *Eur. Heart J.* **39**, 1981–1987 (2018).
4. Blom, L. J. *et al.* Incidence and predictors of implantable cardioverter-defibrillator therapy and its complications in idiopathic ventricular fibrillation patients. *Europace* **21**, 1519–1526 (2019).
5. Conte, G. *et al.* True idiopathic ventricular fibrillation in out-of-hospital cardiac arrest survivors in the Swiss Canton Ticino: Prevalence, clinical features, and long-term follow-up. *Europace* **19**, 259–266 (2017).
6. Conte, G. *et al.* Out-of-hospital cardiac arrest due to idiopathic ventricular fibrillation in patients with normal electrocardiograms: Results from a multicentre long-term registry. *Europace* **21**, 1670–1677 (2019).
7. Chaudhry, U. *et al.* Idiopathic ventricular fibrillation – Long term prognosis in relation to clinical findings and ECG patterns in a Swedish cohort. *J. Electrocardiol.* **56**, 46–51 (2019).
8. Cunningham, T. *et al.* Initially unexplained cardiac arrest in children and adolescents: A national experience from the Canadian Pediatric Heart Rhythm Network. *Heart Rhythm* **17**, 975–981 (2020).
9. Frontera, A. *et al.* Long-Term Follow-Up of Idiopathic Ventricular Fibrillation in a Pediatric Population: Clinical Characteristics, Management, and Complications. *J. Am. Heart Assoc.* **8**, (2019).
10. Jiménez-Jáimez, J. *et al.* Diagnostic Approach to Unexplained Cardiac Arrest (from the FIVI-Gen Study). *Am. J. Cardiol.* **116**, 894–899 (2015).
11. Peres, N. *et al.* Comprehensive assessment of unexplained sudden cardiac death and idiopathic ventricular fibrillation during the index hospitalization: A systematic thorough investigation to unmask specific etiology. *Arch. Cardiovasc. Dis. Suppl.* **12**, 106–107 (2020).
12. Stampe, N. K. *et al.* Clinical characteristics and risk factors of arrhythmia during follow-up of patients with idiopathic ventricular fibrillation. *J. Cardiovasc. Electrophysiol.* **31**, 2677–2686 (2020).
13. Stępień-Wojno, M. *et al.* Sudden cardiac arrest in patients without overt heart disease: A limited value of next generation sequencing. *Polish Arch. Intern. Med.* **128**, 721–730 (2018).
14. Andreini, D. *et al.* CMR for Identifying the Substrate of Ventricular Arrhythmia in Patients With Normal Echocardiography. *JACC Cardiovasc. Imaging* **13**, 410–421 (2020).
15. Baritussio, A. *et al.* Out of hospital cardiac arrest survivors with inconclusive coronary angiogram: Impact of cardiovascular magnetic resonance on clinical management and decision-making. *Resuscitation* **116**, 91–97 (2017).
16. Hennig, A. *et al.* High-resolution three-dimensional late gadolinium-enhanced cardiac magnetic resonance imaging to identify the

underlying substrate of ventricular arrhythmia. *Europace* **20**, f179–f191 (2018).

17. Kim, S. M. *et al.* Cardiac magnetic resonance imaging for nonischemic cardiac disease in out-of-hospital cardiac arrest survivors treated with targeted temperature management: A multicenter retrospective analysis. *J. Clin. Med.* **10**, 1–11 (2021).
18. Neilan, T. G. *et al.* Late gadolinium enhancement among survivors of sudden cardiac arrest. *JACC Cardiovasc. Imaging* **8**, 414–423 (2015).
19. Marstrand, P. *et al.* Cardiac magnetic resonance imaging After ventricular tachyarrhythmias increases diagnostic precision and reduces the need for family screening for inherited cardiac disease. *Europace* **18**, 1860–1865 (2016).
20. Rodrigues, P. *et al.* Diagnosis and Prognosis in Sudden Cardiac Arrest Survivors Without Coronary Artery Disease: Utility of a Clinical Approach Using Cardiac Magnetic Resonance Imaging. *Circ. Cardiovasc. Imaging* **10**, 1–9 (2017).
21. White, J. A. *et al.* Utility of cardiovascular magnetic resonance in identifying substrate for malignant ventricular arrhythmias. *Circ. Cardiovasc. Imaging* **5**, 12–20 (2012).
22. Zaremba, T., Brøndberg, A. K., Jensen, H. K. & Kim, W. Y. Cardiac magnetic resonance characteristics in young survivors of aborted sudden cardiac death. *Eur. J. Radiol.* **105**, 141–147 (2018).
23. Zorzi, A. *et al.* Diagnostic value and prognostic implications of early cardiac magnetic resonance in survivors of out-of-hospital cardiac arrest. *Hear. Rhythm* **15**, 1031–1041 (2018).
24. Zorzi, A. *et al.* Prognostic role of myocardial edema as evidenced by early cardiac magnetic resonance in survivors of out-of-hospital cardiac arrest: A multicenter study. *J. Am. Heart Assoc.* **10**, 1–13 (2021).
